# Supplementary material
Source: publisher figshare collection journal article supplement (https://acs.figshare.com/ndownloader/files/5693937)
Supplement: Supplementary file 1 [file 5693937]

Supporting Information

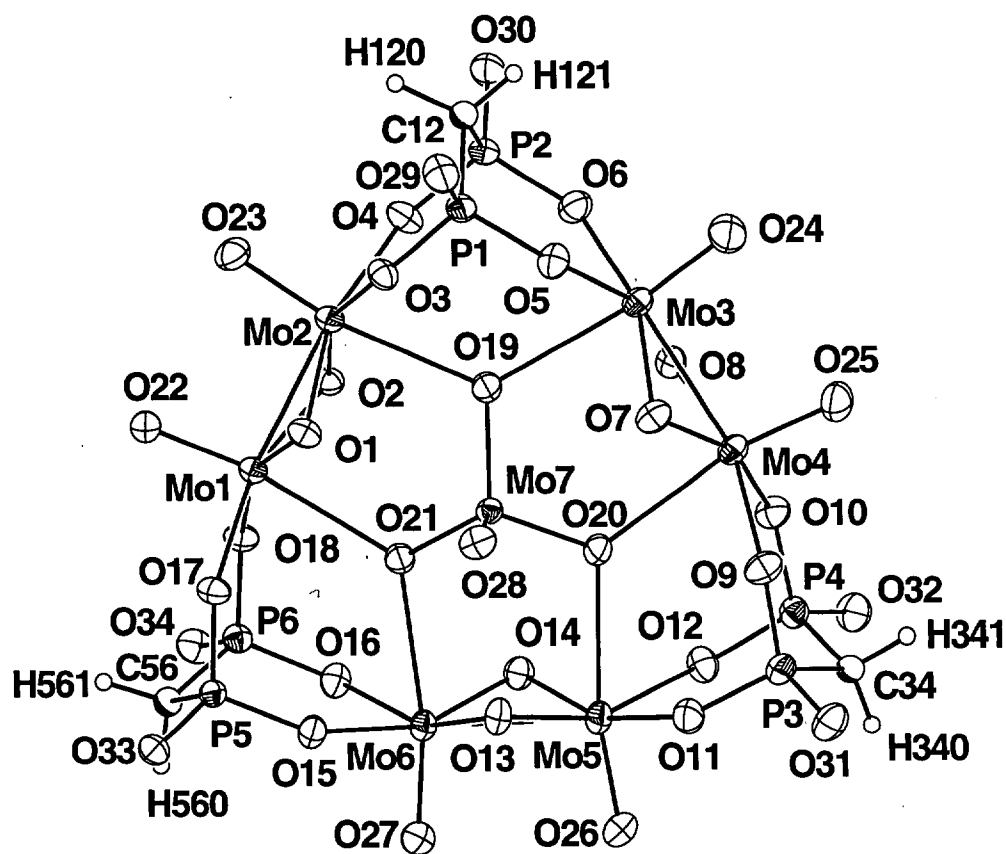

**Figure S1.** An ORTEP plot of the anion  $[\text{Mo}^{\text{V}}_6\text{Mo}^{\text{VI}}\text{O}_{16}(\text{O}_3\text{PCH}_2\text{PO}_3)_3]^{8-}$  in compound **1** with all atoms labeled.

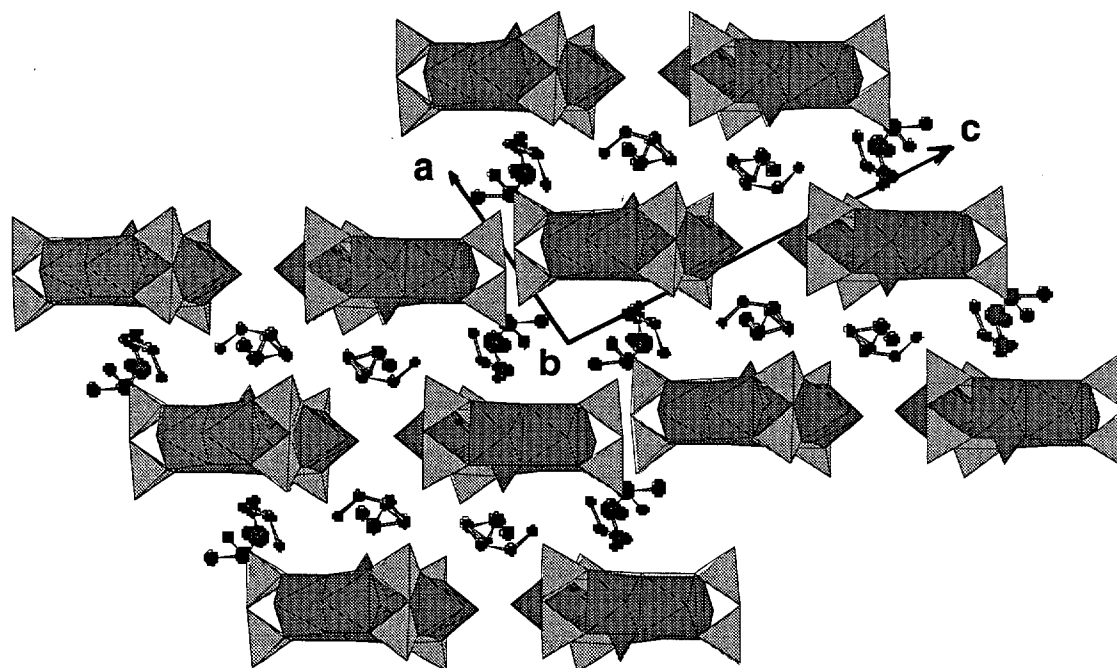

**Figure S2.** Projection along the b axis showing the alternation of inorganic anionic layers ( $[\text{Mo}^{\text{V}}_6\text{Mo}^{\text{VI}}\text{O}_{16}(\text{O}_3\text{PCH}_2\text{PO}_3)_3]^{8-}$  : polyhedral representation) and organic cationic layers (diamines : black circles). Water molecules are omitted for clarity.

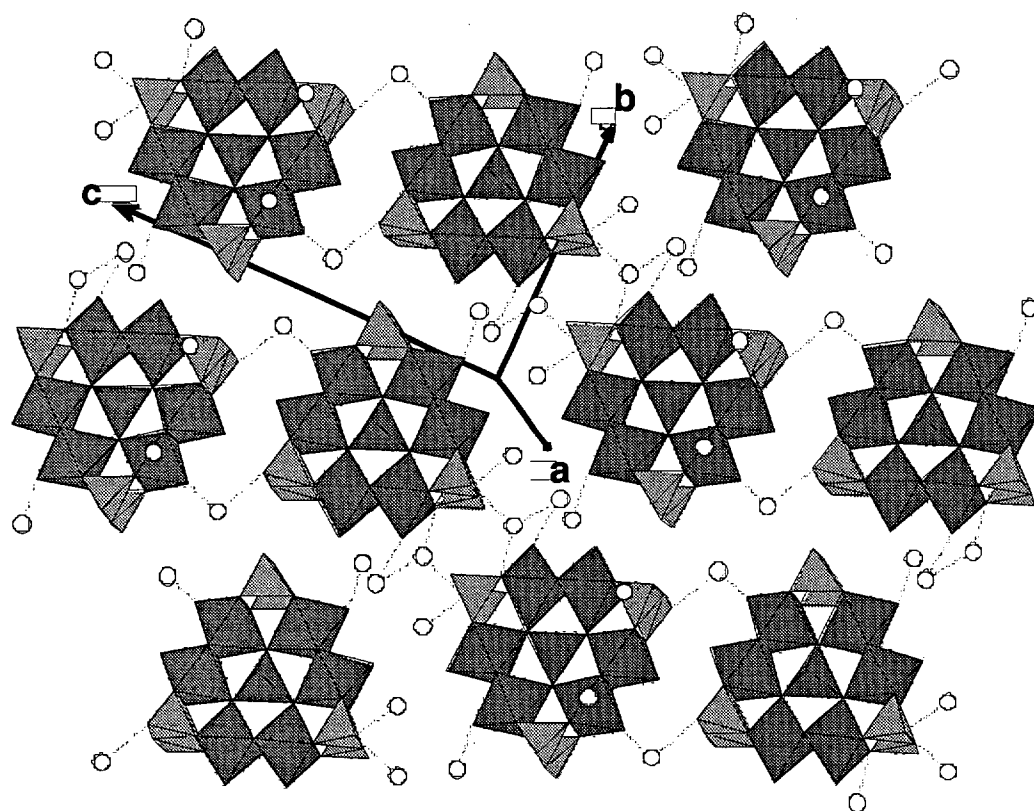

**Figure S3.** Projection showing an inorganic layer and hydrogen bonds (dotted lines) between  $[\text{Mo}^{\text{V}}_6\text{Mo}^{\text{VI}}\text{O}_{16}(\text{O}_3\text{PCH}_2\text{PO}_3)_3]^{8-}$  anions (polyhedral representation) and water molecules (empty circles). Diamines are omitted for clarity.
